# Supplementary material for: Persistent differences between coastal and offshore kelp forest communities in a warming Gulf of Maine
Source: PLoS One. 2018 Jan 3;13(1):e0189388. doi: 10.1371/journal.pone.0189388 (PMC5751975; doi:10.1371/journal.pone.0189388)
Supplement: S9 Table — Analysis indicates the contribution of each species or group to coastal vs offshore differences. (XLSX) [file pone.0189388.s012.xlsx]

## Sheet: Sheet1
S9 Table. SIMPER analysis of benthic communities indicating the contribution of each species or group to coastal vs offshore differences.
Species	Global mean	SD	Ratio	Mean site 1	Mean site 2	Specific contribution to dissimilarity	P-value
Dasysiphonia.japonica	0.1546	0.135323	1.14266	34.7478	5.28819	0.1922	0.004975
Sediment/diatom	0.101	0.0786622	1.28376	11.3922	23.2789	0.1255	0.004975
Lithothamnion.sp.	0.09548	0.0742001	1.28678	3.90882	21.274	0.1187	0.004975
Chondrus.crust	0.08792	0.0662457	1.32719	0.112118	17.675	0.1093	0.004975
Euthora.cristata	0.06077	0.0471679	1.28829	12.2854	0.736686	0.0755	0.004975
Corallinaceae.sp.	0.0297	0.0340135	0.87331	2.49932	5.34846	0.0369	0.004975
Eudendrium.sp.	0.02258	0.054108	0.41733	1.14945	3.77731	0.0281	0.00995
Modiolus.sp.	0.01998	0.049104	0.40684	0.133602	3.91188	0.0248	0.004975
Mytilus.edulis	0.0101	0.0429861	0.23498	0.20114	1.8586	0.0126	0.00995
Aplidium.constellatum	0.009049	0.0204066	0.44344	0.152835	1.7203	0.0112	0.004975
Isodictya.deichmannae	0.007648	0.0234924	0.32554	0.353034	1.25894	0.0095	0.024876
Parasmittina.sp	0.007337	0.0144489	0.50776	0.188778	1.36382	0.0091	0.004975
Corallina.officinalis	0.004682	0.0089093	0.52553	0.121016	0.882016	0.0058	0.004975
Molgula.sp.	0.003199	0.0109267	0.2928	0.031786	0.614784	0.004	0.004975
Diplosoma.listeriatum	0.002814	0.0107725	0.26119	0.010888	0.554454	0.0034	0.004975
